# Supplementary material for: Socioeconomic status and stroke incidence, prevalence, mortality, and worldwide burden: an ecological analysis from the Global Burden of Disease Study 2017
Source: BMC Med. 2019 Oct 24;17:191. doi: 10.1186/s12916-019-1397-3 (PMC6813111; doi:10.1186/s12916-019-1397-3)
Supplement: Supplementary file 3 — Table S2. Sex differences in stroke-related deaths and burden attributable to modifiable risk factors. (XLSX 501 kb) [file 12916_2019_1397_MOESM3_ESM.xlsx]

## Sheet: S2 - Table 1-1
Table S2. Sex differences in stroke-related deaths and burden attributable to modifiable risk factors
	Stroke			Ischemic stroke			Intracerebral haemorrhage			Subarachnoid haemorrhage
	Female to male ratio			Female to male ratio			Female to male ratio			Female to male ratio
	1990	2017	Change (%)	1990	2017	Change (%)	1990	2017	Change (%)	1990	2017	Change (%)
Deaths
Global
Air pollution	1.06	0.86	-18.8679	1.21	0.97	-19.8347	0.95	0.79	-16.8421	1.18	1	-15.2542
Other environmental risks	0.66	0.59	-10.6061	0.75	0.64	-14.6667	0.61	0.54	-11.4754	0.83	0.75	-9.63855
Tobacco	0.47	0.3	-36.1702	0.52	0.33	-36.5385	0.41	0.28	-31.7073	0.58	0.37	-36.2069
Alcohol use	0.07	0.04	-42.8571	-0.44	-0.26	-40.9091	0.24	0.14	-41.6667	n/a	n/a	n/a
High fasting plasma glucose	1.13	0.95	-15.9292	1.3	1.08	-16.9231	0.97	0.82	-15.4639	1.18	0.92	-22.0339
High systolic blood pressure	1.17	0.95	-18.8034	1.38	1.08	-21.7391	1.02	0.85	-16.6667	1.23	1	-18.6992
High body-mass index	1.25	0.95	-24	1.48	1.07	-27.7027	1.11	0.86	-22.5225	1.45	1.07	-26.2069
Dietary risks	1.01	0.81	-19.802	1.15	0.9	-21.7391	0.91	0.75	-17.5824	1.11	0.94	-15.3153
Low physical activity	1.45	1.2	-17.2414	1.45	1.2	-17.2414	n/a	n/a	n/a	n/a	n/a	n/a
Impaired kidney function	1.37	1.18	-13.8686	1.68	1.36	-19.0476	1.21	1	-17.3554	n/a	n/a	n/a
High LDL cholesterol	1.41	1.19	-15.6028	1.41	1.19	-15.6028	n/a	n/a	n/a	n/a	n/a	n/a
World Bank Low Income
Air pollution	1.16	1.08	-6.89655	1.63	1.53	-6.13497	1.02	0.93	-8.82353	0.75	0.8	6.66667
Other environmental risks	0.6	0.64	6.66667	0.83	0.8	-3.61446	0.53	0.57	7.54717	0.5	0.5	0
Tobacco	0.34	0.3	-11.7647	0.46	0.4	-13.0435	0.3	0.27	-10	0.22	0.17	-22.7273
Alcohol use	0.31	0.14	-54.8387	-0.67	-1.67	149.254	0.43	0.31	-27.907	n/a	n/a	n/a
High fasting plasma glucose	0.97	1.04	7.21649	1.39	1.45	4.31655	0.81	0.89	9.87654	0.63	0.67	6.34921
High systolic blood pressure	1.11	1.04	-6.30631	1.57	1.43	-8.9172	0.98	0.91	-7.14286	0.76	0.69	-9.21053
High body-mass index	1.36	1.31	-3.67647	2	1.9	-5	1.26	1.2	-4.7619	1	1	0
Dietary risks	1.03	1	-2.91262	1.44	1.37	-4.86111	0.91	0.88	-3.2967	0.75	0.73	-2.66667
Low physical activity	1.43	1.45	1.3986	1.43	1.45	1.3986	n/a	n/a	n/a	n/a	n/a	n/a
Impaired kidney function	1.38	1.38	0	1.92	1.89	-1.5625	1.14	1.15	0.877193	n/a	n/a	n/a
High LDL cholesterol	1.64	1.58	-3.65854	1.64	1.58	-3.65854	n/a	n/a	n/a	n/a	n/a	n/a
World Bank Lower Middle Income
Air pollution	1.05	0.95	-9.52381	1.26	1.07	-15.0794	0.93	0.88	-5.37634	1	1.14	14
Other environmental risks	0.67	0.65	-2.98507	0.79	0.74	-6.32911	0.61	0.62	1.63934	0.75	0.75	0
Tobacco	0.34	0.29	-14.7059	0.38	0.3	-21.0526	0.3	0.27	-10	0.36	0.31	-13.8889
Alcohol use	0.08	0.15	87.5	-0.3	0.06	-120	0.2	0.18	-10	n/a	n/a	n/a
High fasting plasma glucose	1.02	0.93	-8.82353	1.21	1.03	-14.876	0.85	0.84	-1.17647	1	0.92	-8
High systolic blood pressure	1.12	1	-10.7143	1.38	1.13	-18.1159	0.97	0.91	-6.18557	1.07	1	-6.54206
High body-mass index	1.39	1.07	-23.0216	1.67	1.18	-29.3413	1.24	1	-19.3548	1.5	1.25	-16.6667
Dietary risks	0.99	0.89	-10.101	1.19	0.99	-16.8067	0.88	0.83	-5.68182	1.03	0.96	-6.79612
Low physical activity	1.38	1.12	-18.8406	1.38	1.12	-18.8406	n/a	n/a	n/a	n/a	n/a	n/a
Impaired kidney function	1.22	1.09	-10.6557	1.56	1.27	-18.5897	1.04	1	-3.84615	n/a	n/a	n/a
High LDL cholesterol	1.39	1.23	-11.5108	1.39	1.23	-11.5108	n/a	n/a	n/a	n/a	n/a	n/a
World Bank Upper Middle Income
Air pollution	1.06	0.77	-27.3585	1.15	0.85	-26.087	0.97	0.71	-26.8041	1.19	0.89	-25.2101
Other environmental risks	0.63	0.52	-17.4603	0.68	0.54	-20.5882	0.6	0.5	-16.6667	0.7	0.5	-28.5714
Tobacco	0.44	0.28	-36.3636	0.46	0.3	-34.7826	0.41	0.25	-39.0244	0.5	0.33	-34
Alcohol use	-0.01	0.03	-400	-0.5	-0.13	-74	0.12	0.09	-25	n/a	n/a	n/a
High fasting plasma glucose	1.2	0.91	-24.1667	1.36	1.03	-24.2647	1.06	0.77	-27.3585	1.31	1	-23.6641
High systolic blood pressure	1.16	0.86	-25.8621	1.35	0.97	-28.1481	1.02	0.78	-23.5294	1.22	0.95	-22.1311
High body-mass index	1.26	0.86	-31.746	1.52	0.98	-35.5263	1.12	0.77	-31.25	1.33	1.05	-21.0526
Dietary risks	1	0.73	-27	1.09	0.78	-28.4404	0.92	0.68	-26.087	1.15	0.84	-26.9565
Low physical activity	1.44	1.09	-24.3056	1.44	1.09	-24.3056	n/a	n/a	n/a	n/a	n/a	n/a
Impaired kidney function	1.41	1.12	-20.5674	1.67	1.3	-22.1557	1.24	0.98	-20.9677	n/a	n/a	n/a
High LDL cholesterol	1.32	1.07	-18.9394	1.32	1.07	-18.9394	n/a	n/a	n/a	n/a	n/a	n/a
World Bank High Income
Air pollution	1.15	1.03	-10.4348	1.27	1.11	-12.5984	0.96	0.87	-9.375	1.4	1.25	-10.7143
Other environmental risks	0.76	0.79	3.94737	0.85	1	17.6471	0.69	0.75	8.69565	1	0.5	-50
Tobacco	0.73	0.61	-16.4384	0.73	0.62	-15.0685	0.64	0.52	-18.75	1.1	0.83	-24.5455
Alcohol use	0.19	-0.14	-173.684	-0.4	-1.4	250	0.5	0.35	-30	n/a	n/a	n/a
High fasting plasma glucose	1.18	1.08	-8.47458	1.28	1.2	-6.25	1	0.89	-11	1.5	1.07	-28.6667
High systolic blood pressure	1.28	1.2	-6.25	1.4	1.34	-4.28571	1.1	1.04	-5.45455	1.57	1.26	-19.7452
High body-mass index	1.1	0.91	-17.2727	1.19	1.03	-13.4454	0.93	0.77	-17.2043	1.5	1.12	-25.3333
Dietary risks	1.09	1.03	-5.50459	1.18	1.15	-2.54237	0.94	0.89	-5.31915	1.41	1.15	-18.4397
Low physical activity	1.53	1.54	0.653595	1.53	1.54	0.653595	n/a	n/a	n/a	n/a	n/a	n/a
Impaired kidney function	1.56	1.53	-1.92308	1.71	1.73	1.16959	1.35	1.28	-5.18519	n/a	n/a	n/a
High LDL cholesterol	1.52	1.53	0.657895	1.52	1.53	0.657895	n/a	n/a	n/a	n/a	n/a	n/a
DALYs (Disability-Adjusted Life Years)
Global
Air pollution	0.97	0.8	-17.5258	1.1	0.89	-19.0909	0.88	0.72	-18.1818	1.1	0.93	-15.4545
Other environmental risks	0.6	0.54	-10	0.67	0.59	-11.9403	0.55	0.49	-10.9091	0.7	0.65	-7.14286
Tobacco	0.43	0.29	-32.5581	0.48	0.31	-35.4167	0.38	0.25	-34.2105	0.57	0.43	-24.5614
Alcohol use	0.08	0.06	-25	-0.32	-0.14	-56.25	0.19	0.12	-36.8421	n/a	n/a	n/a
High fasting plasma glucose	0.99	0.83	-16.1616	1.12	0.93	-16.9643	0.86	0.72	-16.2791	1.14	0.95	-16.6667
High systolic blood pressure	1	0.83	-17	1.17	0.94	-19.6581	0.88	0.73	-17.0455	1.1	0.95	-13.6364
High body-mass index	1.16	0.91	-21.5517	1.33	1.03	-22.5564	1.03	0.81	-21.3592	1.38	1.13	-18.1159
Dietary risks	0.92	0.76	-17.3913	1.03	0.84	-18.4466	0.83	0.68	-18.0723	1.07	0.92	-14.0187
Low physical activity	1.25	1.03	-17.6	1.25	1.03	-17.6	n/a	n/a	n/a	n/a	n/a	n/a
Impaired kidney function	1.17	0.99	-15.3846	1.39	1.16	-16.5468	1.03	0.86	-16.5049	n/a	n/a	n/a
High LDL cholesterol	1.14	0.99	-13.1579	1.14	0.99	-13.1579	n/a	n/a	n/a	n/a	n/a	n/a
World Bank Low Income
Air pollution	1.14	1.02	-10.5263	1.62	1.43	-11.7284	1.03	0.91	-11.6505	0.87	0.79	-9.1954
Other environmental risks	0.61	0.62	1.63934	0.85	0.82	-3.52941	0.54	0.54	0	0.53	0.57	7.54717
Tobacco	0.33	0.28	-15.1515	0.43	0.37	-13.9535	0.3	0.26	-13.3333	0.29	0.27	-6.89655
Alcohol use	0.33	0.17	-48.4848	-0.51	-0.87	70.5882	0.44	0.29	-34.0909	n/a	n/a	n/a
High fasting plasma glucose	0.96	0.98	2.08333	1.36	1.37	0.735294	0.81	0.82	1.23457	0.77	0.8	3.8961
High systolic blood pressure	1.06	0.94	-11.3208	1.51	1.32	-12.5828	0.95	0.84	-11.5789	0.8	0.73	-8.75
High body-mass index	1.36	1.31	-3.67647	2.01	1.89	-5.97015	1.26	1.21	-3.96825	1.09	1.08	-0.917431
Dietary risks	1.03	0.95	-7.76699	1.45	1.31	-9.65517	0.92	0.84	-8.69565	0.81	0.78	-3.7037
Low physical activity	1.46	1.34	-8.21918	1.46	1.34	-8.21918	n/a	n/a	n/a	n/a	n/a	n/a
Impaired kidney function	1.33	1.24	-6.76692	1.85	1.7	-8.10811	1.13	1.05	-7.07965	n/a	n/a	n/a
High LDL cholesterol	1.61	1.43	-11.1801	1.61	1.43	-11.1801	n/a	n/a	n/a	n/a	n/a	n/a
World Bank Lower Middle Income
Air pollution	1.01	0.9	-10.8911	1.18	1.01	-14.4068	0.91	0.82	-9.89011	1.11	1.01	-9.00901
Other environmental risks	0.66	0.63	-4.54545	0.76	0.7	-7.89474	0.59	0.58	-1.69492	0.74	0.73	-1.35135
Tobacco	0.33	0.28	-15.1515	0.38	0.3	-21.0526	0.3	0.26	-13.3333	0.39	0.35	-10.2564
Alcohol use	0.11	0.14	27.2727	-0.18	0.06	-133.333	0.18	0.16	-11.1111	n/a	n/a	n/a
High fasting plasma glucose	0.94	0.85	-9.57447	1.1	0.94	-14.5455	0.83	0.77	-7.22892	1.01	0.95	-5.94059
High systolic blood pressure	1.03	0.9	-12.6214	1.24	1.03	-16.9355	0.91	0.82	-9.89011	1.06	0.98	-7.54717
High body-mass index	1.35	1.06	-21.4815	1.6	1.2	-25	1.22	0.98	-19.6721	1.5	1.2	-20
Dietary risks	0.95	0.85	-10.5263	1.12	0.95	-15.1786	0.85	0.78	-8.23529	1.04	0.96	-7.69231
Low physical activity	1.23	1.05	-14.6341	1.23	1.05	-14.6341	n/a	n/a	n/a	n/a	n/a	n/a
Impaired kidney function	1.1	0.97	-11.8182	1.37	1.14	-16.7883	0.95	0.87	-8.42105	n/a	n/a	n/a
High LDL cholesterol	1.24	1.09	-12.0968	1.24	1.09	-12.0968	n/a	n/a	n/a	n/a	n/a	n/a
World Bank Upper Middle Income
Air pollution	0.95	0.68	-28.4211	1.02	0.76	-25.4902	0.87	0.61	-29.8851	1.11	0.83	-25.2252
Other environmental risks	0.58	0.47	-18.9655	0.62	0.51	-17.7419	0.54	0.43	-20.3704	0.69	0.56	-18.8406
Tobacco	0.4	0.25	-37.5	0.42	0.27	-35.7143	0.37	0.22	-40.5405	0.48	0.36	-25
Alcohol use	0.02	0.03	50	-0.36	-0.09	-75	0.11	0.08	-27.2727	n/a	n/a	n/a
High fasting plasma glucose	1.04	0.78	-25	1.16	0.9	-22.4138	0.92	0.66	-28.2609	1.17	0.91	-22.2222
High systolic blood pressure	0.98	0.75	-23.4694	1.14	0.86	-24.5614	0.87	0.65	-25.2874	1.08	0.87	-19.4444
High body-mass index	1.16	0.81	-30.1724	1.37	0.96	-29.927	1.02	0.7	-31.3725	1.32	1.03	-21.9697
Dietary risks	0.91	0.67	-26.3736	0.98	0.75	-23.4694	0.83	0.59	-28.9157	1.05	0.82	-21.9048
Low physical activity	1.23	0.96	-21.9512	1.23	0.96	-21.9512	n/a	n/a	n/a	n/a	n/a	n/a
Impaired kidney function	1.2	0.95	-20.8333	1.39	1.12	-19.4245	1.08	0.82	-24.0741	n/a	n/a	n/a
High LDL cholesterol	1.06	0.9	-15.0943	1.06	0.9	-15.0943	n/a	n/a	n/a	n/a	n/a	n/a
World Bank High Income
Air pollution	0.92	0.82	-10.8696	0.99	0.88	-11.1111	0.76	0.66	-13.1579	1.25	1.13	-9.6
Other environmental risks	0.6	0.63	5	0.64	0.66	3.125	0.5	0.54	8	0.86	0.86	0
Tobacco	0.69	0.61	-11.5942	0.69	0.61	-11.5942	0.58	0.49	-15.5172	1.11	0.94	-15.3153
Alcohol use	0.18	-0.05	-127.778	-0.29	-0.77	165.517	0.41	0.31	-24.3902	n/a	n/a	n/a
High fasting plasma glucose	0.96	0.84	-12.5	1.02	0.9	-11.7647	0.8	0.69	-13.75	1.35	1.11	-17.7778
High systolic blood pressure	1.01	0.92	-8.91089	1.09	0.99	-9.17431	0.84	0.74	-11.9048	1.3	1.17	-10
High body-mass index	0.98	0.86	-12.2449	1.04	0.91	-12.5	0.81	0.68	-16.0494	1.38	1.23	-10.8696
Dietary risks	0.91	0.85	-6.59341	0.95	0.89	-6.31579	0.76	0.68	-10.5263	1.27	1.19	-6.29921
Low physical activity	1.26	1.19	-5.55556	1.26	1.19	-5.55556	n/a	n/a	n/a	n/a	n/a	n/a
Impaired kidney function	1.21	1.14	-5.78512	1.35	1.28	-5.18519	1.03	0.95	-7.76699	n/a	n/a	n/a
High LDL cholesterol	1.12	1.09	-2.67857	1.12	1.09	-2.67857	n/a	n/a	n/a	n/a	n/a	n/a
Note: Data were extracted from Global Burden of Disease Collaborative Network. Global Burden of Disease Study 2017 (GBD 2017) Results. Seattle, United States: Institute for Health Metrics and Evaluation (IHME), 2018. Available from http://ghdx.healthdata.org/gbd-results-tool. (Accessed May 19, 2019); Rates are defined per 100,000 people; LDL, low-density lipoprotein; n/a, not applicable (zero).
